# Supplementary material
Source: PubMed Central journal article supplement (PMC2952266)

## Supplemental Data

### Supplemental file 1.

The array layout of the Oligo GEArray® human angiogenesis array and the list of genes with expression changed after WSS25 treatment.

Table 1 shows the array layout of the Oligo GEArray® human angiogenesis array.

Table 2 is the list of gene with expression alteration after WSS25 treatment.

Table 1 Array layout of Oligo GEArray® human angiogenesis microarray

|          |        |         |           |         |         |       |        |
|----------|--------|---------|-----------|---------|---------|-------|--------|
| RPS27A   | AKT1   | ANGPT1  | ANGPT2    | ANGPTL3 | ANGPTL4 | ANPEP | BAI1   |
| 1        | 2      | 3       | 4         | 5       | 6       | 7     | 8      |
| CCL11    | CCL2   | CDH5    | COL18A1   | COL4A3  | CSF3    | CXCL1 | CXCL10 |
| 9        | 10     | 11      | 12        | 13      | 14      | 15    | 16     |
| CXCL11   | CXCL2  | CXCL3   | CXCL5     | CXCL6   | CXCL9   | ECGF1 | EDG1   |
| 17       | 18     | 19      | 20        | 21      | 22      | 23    | 24     |
| EFNA1    | EFNA2  | EFNA3   | EFNA5     | EFNB2   | EGF     | ENG   | EPAS1  |
| 25       | 26     | 27      | 28        | 29      | 30      | 31    | 32     |
| EPHB4    | EREG   | F2      | FGF1      | FGF2    | FGF6    | FGFR3 | FIGF   |
| 33       | 34     | 35      | 36        | 37      | 38      | 39    | 40     |
| FLT1     | HAND2  | HGF     | HIF1A     | HPSE    | ID1     | ID3   | IFNA1  |
| 41       | 42     | 43      | 44        | 45      | 46      | 47    | 48     |
| IFNB1    | IFNG   | IGF1    | IL10      | IL12A   | IL18    | IL1B  | IL6    |
| 49       | 50     | 51      | 52        | 53      | 54      | 55    | 56     |
| IL8      | ITGAV  | ITGB3   | JAG1      | KDR     | LAMA5   | LECT1 | LEP    |
| 57       | 58     | 59      | 60        | 61      | 62      | 63    | 64     |
| MDK      | MMP19  | MMP2    | MMP9      | NOTCH4  | NPPB    | NPR1  | NRP1   |
| 65       | 66     | 67      | 68        | 69      | 70      | 71    | 72     |
| NRP2     | NUDT6  | PDGFA   | PDGFB     | PECAM1  | PF4     | PGF   | PLAU   |
| 73       | 74     | 75      | 76        | 77      | 78      | 79    | 80     |
| PLG      | PLXDC1 | PROK2   | PTEN      | PTGS1   | PTGS2   | PTN   | RNASE4 |
| 81       | 82     | 83      | 84        | 85      | 86      | 87    | 88     |
| SERPINF1 | SH2D2A | SPHK1   | STAB1     | STAB2   | TEK     | TGFA  | TGFB1  |
| 89       | 90     | 91      | 92        | 93      | 94      | 95    | 96     |
| TGFB2    | TGFB3  | TGFBR1  | THBS1     | THBS2   | TIE     | TIMP1 | TIMP2  |
| 97       | 98     | 99      | 100       | 101     | 102     | 103   | 104    |
| TIMP3    | TNF    | TNFAIP2 | TNFRSF12A | TNFSF15 | TNNT1   | VEGF  | VEGFB  |
| 105      | 106    | 107     | 108       | 109     | 110     | 111   | 112    |
| VEGFC    | VG5Q   | PUC18   | Blank     | Blank   | AS1R2   | AS1R1 | AS1    |

|      |     |       |       |      |      |       |       |
|------|-----|-------|-------|------|------|-------|-------|
| 113  | 114 | 115   | 116   | 117  | 118  | 119   | 120   |
| GAPD | B2M | HSPCB | HSPCB | ACTB | ACTB | BAS2C | BAS2C |
| 121  | 122 | 123   | 124   | 125  | 126  | 127   | 128   |

Table 2

| Position | GeneBank  | Symbol | Description                                                                                                        | WS25/Control |
|----------|-----------|--------|--------------------------------------------------------------------------------------------------------------------|--------------|
| 18       | NM_002089 | CXCL2  | Chemokine (C-X-C motif)<br>ligand 2                                                                                | 3.8764E+1    |
| 20       | NM_002994 | CXCL5  | Chemokine (C-X-C motif)<br>ligand 5                                                                                | 3.8651E+1    |
| 24       | NM_001400 | EDG1   | Endothelial differentiation,<br>sphingolipid<br>G-protein-coupled receptor,<br>1                                   | 3.6403E+0    |
| 29       | NM_004093 | EFNB2  | Ephrin-B2                                                                                                          | 2.1313E+1    |
| 45       | NM_006665 | HPSE   | Heparanase                                                                                                         | 2.7227E+0    |
| 53       | NM_000882 | IL12A  | Interleukin 12A (natural<br>killer cell stimulatory factor<br>1, cytotoxic lymphocyte<br>maturation factor 1, p35) | 2.4543E+0    |
| 60       | NM_000214 | JAG1   | Jagged 1 (Alagille syndrome)                                                                                       | 4.8677E+0    |
| 71       | NM_000906 | NPR1   | Natriuretic peptide receptor<br>A/guanylate cyclase A<br>(atrionatriuretic peptide<br>receptor A)                  | 4.7958E+0    |
| 76       | NM_002608 | PDGFB  | Platelet-derived growth<br>factor beta polypeptide<br>(simian sarcoma viral (v-sis)<br>oncogene homolog)           | 2.1241E+1    |
| 84       | NM_000314 | PTEN   | Phosphatase and tensin<br>homolog (mutated in<br>multiple advanced cancers 1)                                      | 4.7935E+0    |
| 85       | NM_000962 | PTGS1  | Prostaglandin-endoperoxide<br>synthase 1 (prostaglandin<br>G/H synthase and<br>cyclooxygenase)                     | 1.7052E+1    |
| 46       | NM_002165 | ID1    | Inhibitor of DNA binding 1,<br>dominant negative<br>helix-loop-helix protein                                       | 5.1298E-4    |

|     |           |        |                                                                                                  |           |
|-----|-----------|--------|--------------------------------------------------------------------------------------------------|-----------|
| 69  | NM_004557 | NOTCH4 | Notch homolog 4<br>(Drosophila)                                                                  | 4.0464E-1 |
| 80  | NM_002658 | PLAU   | Plasminogen activator,<br>urokinase                                                              | 4.7772E-2 |
| 88  | NM_001145 | ANG    | Angiogenin, ribonuclease,<br>RNase A family, 5                                                   | 1.4712E-1 |
| 94  | NM_000459 | TEK    | TEK tyrosine kinase,<br>endothelial (venous<br>malformations, multiple<br>cutaneous and mucosal) | 5.7841E-2 |
| 110 | NM_003283 | TNNT1  | Troponin T type 1 (skeletal,<br>slow)                                                            | 2.1087E-1 |

Note: The upregulated genes were selected based on the value of WSS25/control >2, while the downregulated genes were selected based on the value of WSS25/control <0.5.

### Supplemental file 2

WGEW has no effect on the tube formation of HMEC-1 cells on Matrigel. HMEC-1 cells (90  $\mu$ L) combined with WGEW (10  $\mu$ L) in different final concentration (100  $\mu$ g/mL, 1 mg/mL) or vehicle were seeded into the 96 well plate pre-coated with 50  $\mu$ L Matrigel for 10 h.

Supplemental file 2

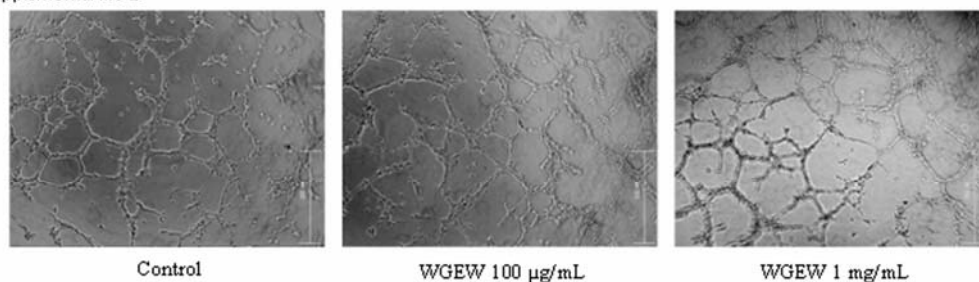

### Supplemental file 3

The results of inhibitory effect of WSS25 on migration of HMEC-1 cells were statistically analyzed. A, Results based on transwell migration assay; B, Results based on wound healing assay.

Supplemental file 3

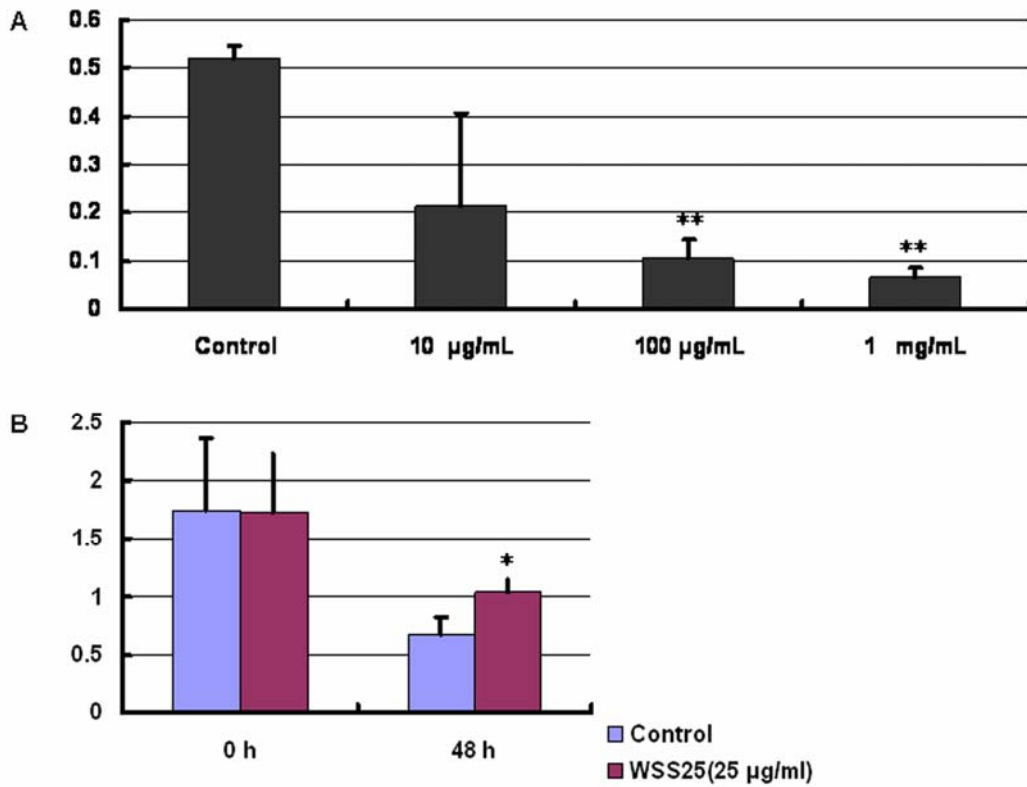

**Supplemental file 4.**

Ki67 (Abcam) immunohistochemistry and TUNEL (R&D) immunohistochemistry were used to analyze the proliferation and apoptosis of the tumor tissue. Compared to the control (A), the expression of Ki67 in the WSS25 treated tissue (B) was reduced. TUNEL assay results showed that there is no significant difference in apoptosis between the control (C) and WSS25 treated tissue (D).

#### Supplemental file 4

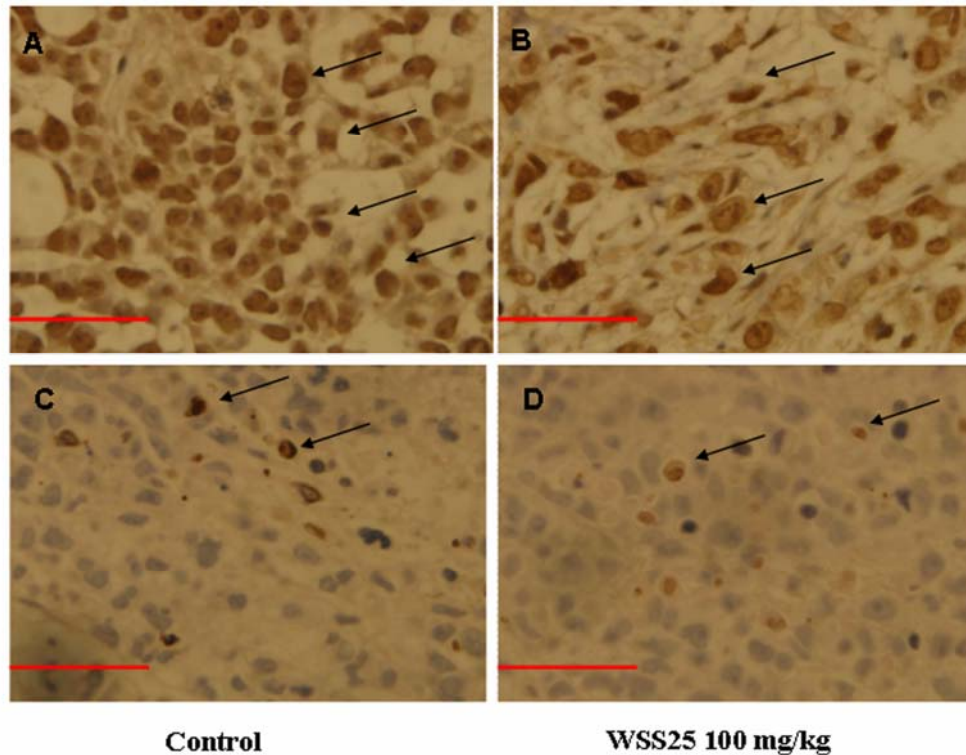

#### Supplemental file 5.

WSS25 inhibits the Id1 expression in Bel7402 cells and growth of the cells. A, Bel7402 cells were seeded into the 96-well plate. After 24 h incubation, WSS25 was added with final concentration at 1  $\mu\text{g/mL}$ , 10  $\mu\text{g/mL}$ , 100  $\mu\text{g/mL}$ , 500  $\mu\text{g/mL}$  and 1  $\text{mg/mL}$ , respectively. The cells were subjected to MTT assay at 24 h ( $\text{---}$ ), 48 h ( $\text{---}$ ), or 72 h ( $\text{---}$ ) later. All experiments were performed according to the Materials and Methods. The results are representatives of triplicate experiments. B, WSS25 (25  $\mu\text{g/mL}$ ) nearly completely inhibited the Id1 mRNA expression in Bel7402 cells with 18S rRNA as the internal control. C, WSS25 down-regulated the Id1 protein expression in Bel7402 cells in a dose dependent manner. The  $\beta$ -actin was used as a control for protein loading.

Supplemental file 5

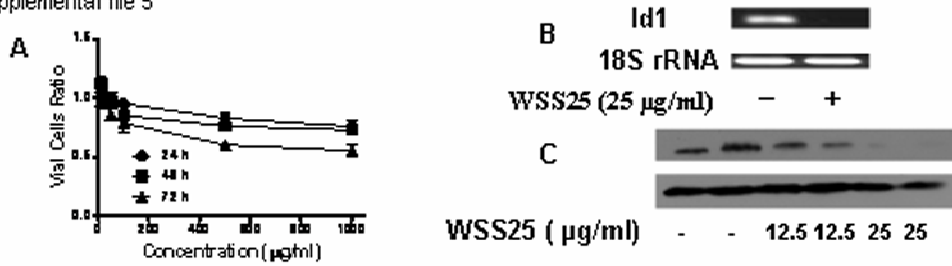

**Supplemental file 6.**

WSS25 blocks BMP/Smad signaling in Bel7402 cells. A, The total RNA in the cells treated by WSS25 (25 µg/mL) for 18 h was extracted and reverse-transcribed into cDNA. The cDNA was then subject to PCR analysis for the detection of BMP2, BMPRIA, BMPRIB, BMPRII, and smad4. B, Cells were pre-treated by 25 µg/mL of WSS25 or vehicle treatment for 23 h. The cells were then treated with 50 ng/mL of BMP2 for 1 h more. The extracted proteins were subjected to Western blotting analysis probed with Id1 and pSmad1/5/8 antibodies. The β-actin was used as a control for protein loading. The experiments were repeated twice.

Supplemental file 6

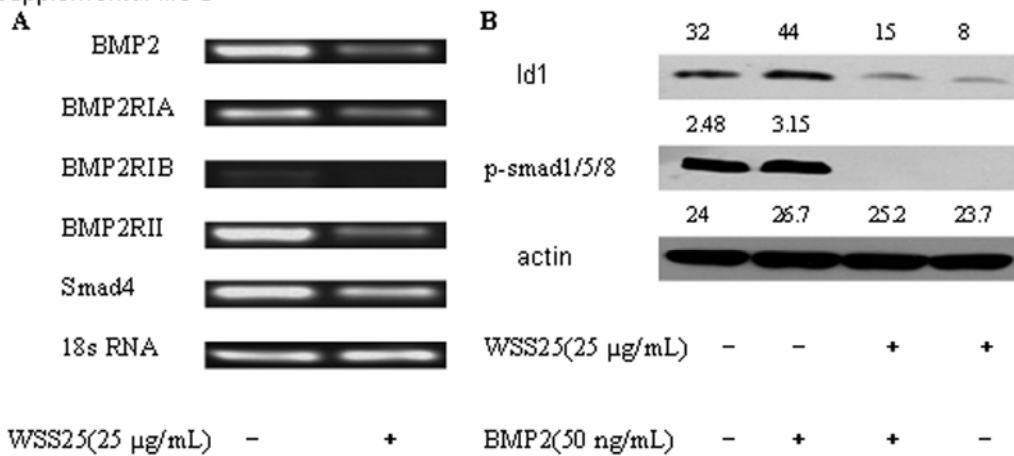

**Supplemental file 7.**

BMP2 expression in HMEC-1 cells with WSS25 treatment in different time point. HMEC-1 cells ( $2 \times 10^5$  cells/well) were seeded into 6-well plates. After 24 h incubation, the cells were cultured with WSS25 (25 µg/mL) for 6 h, 12 h, 18 h, and 24h, respectively. The total RNA of the cells was then extracted and reverse-transcribed into cDNA. RT-PCR was performed as described in materials and methods to detect the expression of BMP2, 18S rRNA as the internal control.

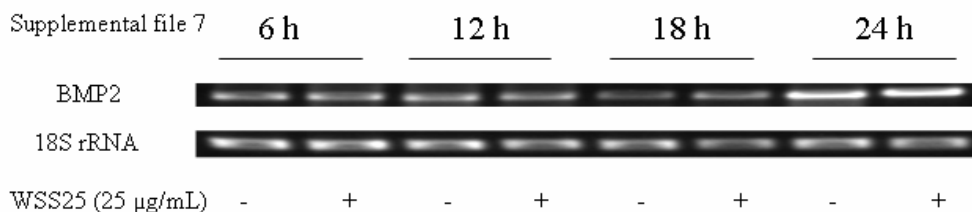

**Supplemental file 8.**

High expression of BMPRII in HMEC-1 cells could partially rescue the inhibitory effect of WSS25 on the tube formation of HMEC-1 cells on Matrigel. Human full-length BMPRII (RC210218) was purchased from OriGene, U.S.A. After the cells were seeded in the 6-well plate for 24 h, the vector pCMV6-Entry (A, B) and the pCMV6-Entry-BMPRII (C, D) plasmid were transferred into HMEC-1 cells, respectively. The cells were subject to tube formation analysis 24 h after transfection with (B, D) or without 20µg/mL WSS25 (A, C). Photos were taken 10 h later using the Olympus microscope IX51.

Supplemental file 8

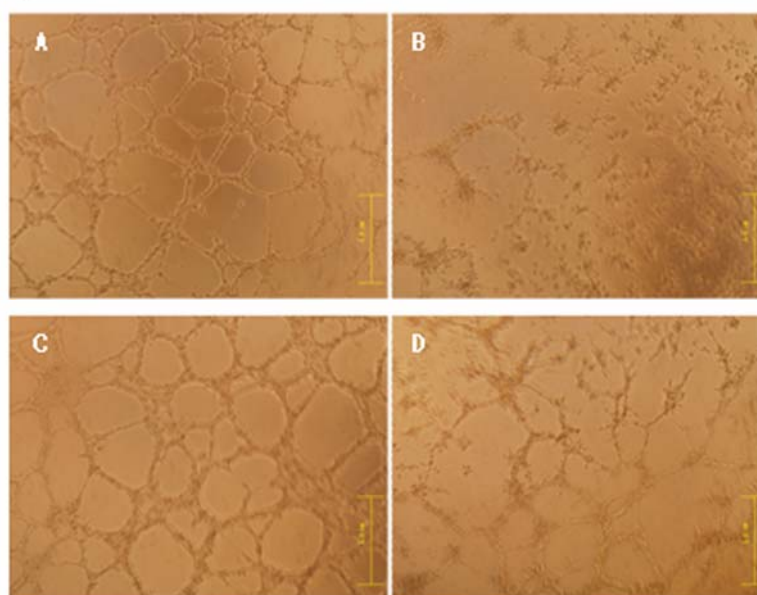

**Supplemental file 9.**

BMP2 could bind to BMP2 receptors. The WSS25 biosensor surface was prepared as described in the part of *Quartz crystal microbalance (QCM) analysis* in the *Experimental Procedures* section. Biotinylated BMP2 receptors (rhBMPRIA, rhBMPRII, rhBMPRII) and rhIgGFc (as control) were synthesized according to the following procedure: NHS-PEG12-Biotin (0.6 µL, 5 mM) in HEPES buffer (10 mM HEPES, 150 mM NaCl, pH 7.4) was added to receptor (39.4 µL, 0.508 mg/mL) in the same buffer, and the mixture was stirred

at room temperature for 30 min. The biotinylated receptors and rhIgGFc can be purified from non-reacted biotin reagent by using desalting column. The biosensor experiments were carried out on Attana A100 QCM instrument (Attana AB, Stockholm, Sweden). The Attana biotin sensor surfaces were mounted in the QCM system and equilibrated with buffer solution (10 mM Hepes, 150 mM NaCl, 0.005% Tween 20, pH 7.4) at a flow rate 25  $\mu$ L/min, and the samples were prepared in the same buffer. Subsequently the streptavidin solution (100  $\mu$ g/ml) was injected, and the biotinylated BMP2 receptors and rhIgGFc were immobilized on the streptavidin surface to produce BMP2 receptors and rhIgGFc biosensor surfaces, respectively. The interaction between BMP2 receptors, rhIgGFc and WSS25, respectively were then measured by injecting WSS25 (500  $\mu$ g/mL, 50  $\mu$ L) in the running buffer (10 mM Hepes, 150 mM NaCl, 0.005% Tween 20, pH 7.4) onto the BMP2 receptors and rhIgGFc biosensor surface, and frequency data were collected. A continuous flow of running buffer at a flow rate of 25 $\mu$ L/min was used throughout. The frequency responses produced from the interactions were monitored by frequency logging with Attester 1.1 (Attana), where the mass changes from the bound or released ligands were recorded as the resulting frequency shifts ( $\Delta f$ ) (Zhichao Pei, et al. Study of Real-time Lectin -carbohydrate Interactions on the Surface of a Quartz Crystal Microbalance. *Biosens. Bioelectron.* 2005, 21, 60-66).

In supplemental file 9, as a control, the frequency responses by the WSS25 interaction with the rhIgGFc (bottom curve) and streptavidin (the second curve from bottom) surface were measured, yielding a small response, respectively. Definitely, the frequency shifts produced from biotinylated rhBMPRII (The third curve from bottom), rhBMPIA (The fourth curve from bottom), and rhBMPIB (The fifth curve from bottom) binding to WSS25 indicated that this polysaccharide could bind to BMP2 receptors in different intensity.

#### Supplemental file 9

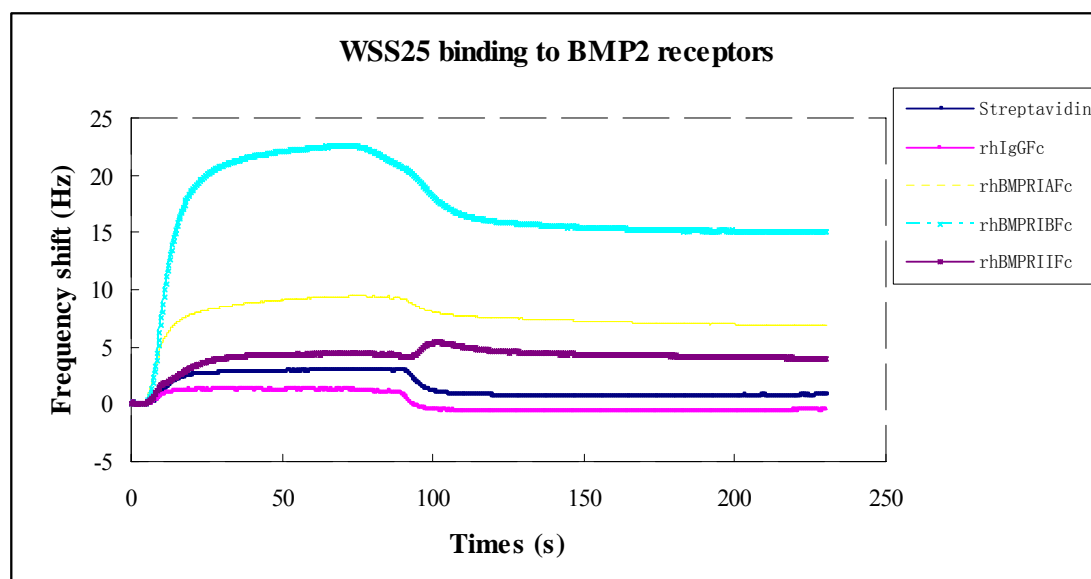

Supplement: supp_M110.105544_jbc.M110.105544-1.pdf [file supp_M110.105544_jbc.M110.105544-1.pdf]
